# Supplementary material for: Complete chloroplast genome sequences of four Allium species: comparative and phylogenetic analyses
Source: PubMed Central journal article supplement (PMC6706373; doi:10.1038/s41598-019-48708-x), 2019-08-22
Supplement: 41598_2019_48708_MOESM1_ESM.pdf [file 41598_2019_48708_MOESM1_ESM.pdf]

# **Complete chloroplast genome sequences of four *Allium* species: comparative and phylogenetic analyses**

**YuMeng Huo<sup>1</sup>, LiMin Gao<sup>1</sup>, BingJiang Liu<sup>1</sup>, YanYan Yang<sup>1</sup>, SuPing Kong<sup>1</sup>, YuQing Sun<sup>2</sup>, YaHui Yang<sup>3</sup>, Xiong Wu<sup>1,\*</sup>**

<sup>1</sup>Key Laboratory for Biology of Greenhouse Vegetable of Shandong Province, National Center for Vegetable Improvement (Shandong Branch), Vegetable and Flower Research Institute of Shandong Academy of Agricultural Sciences, Jinan, 250100, China

<sup>2</sup>College of Horticulture and Landscape Architecture, Northeast Agricultural University, Harbin, 150030, China

<sup>3</sup>College of Horticulture Science and Engineering, Shandong Agricultural University, Taian, 271018, China

\*Corresponding Author: Xiong Wu

Telephone and Fax: +86(0)531-6665-9755

Email address: wutta2014@163.com

# Supplementary Tables

Supplementary Table S1. Basic information about the library, DNA extraction and assembly.

Supplementary Table S2. Summary of the sequencing data and assembled evaluation for four *Allium* species.

Supplementary Table S3. List of genes in nine cp genome of *Allium* species.

Supplementary Table S4. Main components and their proportions in nine *Allium* cp genomes.

Supplementary Table S5. List of the difference in genes content from nine *Allium* cp genome.

Supplementary Table S6. GC content (%) of sequence in nine cp genomes of *Allium* species.

Supplementary Table S7. The content, length (bp) and GC (%) of pseudogene in *Allium* species.

Supplementary Table S8. The numbers of tandem repeats, dispersed, and palindromic in nine *Allium* cp genomes.

Supplementary Table S9. Types and numbers of SSRs motifs in nine *Allium* cp genomes.

Supplementary Table S10. The conservation statistic of nine *Allium* cp genome sequences using mVISTA.

Supplementary Table S11. Numbers of nucleotide substitutions and sequence distance in nine complete cp genomes.

Supplementary Table S12. Sites and models in ML and BI analyses for each dataset.

| Species                               | DNA extraction | Sequencing platform | Read length | Assembly software |
|---------------------------------------|----------------|---------------------|-------------|-------------------|
| <i>A. fistulosum</i>                  | HSLp           | Hiseq4000           | PE150       | NOVOPlasty2.6.2   |
| <i>A. tuberosum</i> Rottl. ex Spreng. | SucDNase       | Hiseq4000           | PE150       | SPAdes 3.11.1     |
| <i>A. sativum</i>                     | HSLp           | Hiseq4000           | PE150       | NOVOPlasty2.6.2   |
| <i>A. cepa</i> N                      | PGEK           | Hiseq2500           | PE100       | NOVOPlasty2.6.2   |

Supplementary Table S1. Basic information about the library, DNA extraction and assembly. HSLp, high-salt low-pH method; SucDNase, sucrose-DNase method; PGEK, Plant Genome Extraction Kit (Tiangen Biotech, Beijing, China).

| Sample                                   | Total number of reads | Total number of bases | Mapped to genome (%) | Mean coverage (X) | Number of gaps |
|------------------------------------------|-----------------------|-----------------------|----------------------|-------------------|----------------|
| <i>A. fistulosum</i>                     | 8,255,274             | 1,238,291,100         | 92.36                | 7,363.85          | 0              |
| <i>A. tuberosum</i><br>Rottl. ex Spreng. | 13,393,542            | 2,009,031,300         | 34.84                | 4,530.64          | 2              |
| <i>A. sativum</i>                        | 10,665,090            | 1,599,763,500         | 74.05                | 7,689.11          | 0              |
| <i>A. cepa</i> N                         | 12,976,420            | 1,297,642,000         | 3.99                 | 334.02            | 0              |

Supplementary Table S2. Summary of the sequencing data and assembled evaluation for four *Allium* species.

| Category for genes                          | Group of gene                       | Name of gene                                                                                                                                                                                                                                                                                                                                          |
|---------------------------------------------|-------------------------------------|-------------------------------------------------------------------------------------------------------------------------------------------------------------------------------------------------------------------------------------------------------------------------------------------------------------------------------------------------------|
| Photosynthesis related genes                | Photosystem I                       | <i>psaA, psaB, psaC, psaI, psaJ</i>                                                                                                                                                                                                                                                                                                                   |
|                                             | Photosystem II                      | <i>psbA, psbB, psbC, psbD, psbE, psbF, psbH, psbI, psbJ, psbK, psbL, psbM, psbN, psbT, psbZ</i>                                                                                                                                                                                                                                                       |
|                                             | Cytochrome b/f complex              | <i>petA, petB, petD, petG, petL, petN</i>                                                                                                                                                                                                                                                                                                             |
|                                             | ATP synthase                        | <i>atpA, atpB(g/ψ), atpE, *atpF, atpH, atpI</i>                                                                                                                                                                                                                                                                                                       |
|                                             | Cytochrome c synthesis              | <i>ccsA</i>                                                                                                                                                                                                                                                                                                                                           |
|                                             | Assembly/stability of photosystem I | <i>**ycf3, ycf4</i>                                                                                                                                                                                                                                                                                                                                   |
|                                             | NADPH dehydrogenase                 | <i>*ndhA, *ndhB(2), ndhC, ndhD, ndhE, ndhF, ndhG, ndhH, ndhI, ndhJ, ndhK</i>                                                                                                                                                                                                                                                                          |
|                                             | Rubisco                             | <i>rbcL(g/ψ)</i>                                                                                                                                                                                                                                                                                                                                      |
| Transcription and translation related genes | Transcription                       | <i>rpoA, rpoB, *rpoC1, rpoC2</i>                                                                                                                                                                                                                                                                                                                      |
|                                             | Translation initiation factor       | <i>ψinfA(del)</i>                                                                                                                                                                                                                                                                                                                                     |
|                                             | Ribosomal proteins                  | <i>rpl14, rpl16, *rpl2(2), rpl20, rpl22, rpl23(2), rpl32, rpl33, rpl36, rps11, *rps12(2), rps14, rps15, *rps16(g/ψ), rps18, rps19(2), rps2(g/ψ), rps3, rps4, rps7(2), rps8</i>                                                                                                                                                                        |
| RNA genes                                   | Ribosomal RNA                       | <i>rrn16(2), rrn23(2), rrn4.5(2), rrn5(2)</i>                                                                                                                                                                                                                                                                                                         |
|                                             | Transfer RNA                        | <i>*trnA-UGC(2), trnC-GCA, trnD-GUC, trnE-UUC, trnF-GAA, trnFM-CAU, *trnG-TCC, trnG-UCC, trnH-GUG(2), trnI-CAU(2), *trnI-GAU(2), *trnK-UUU, trnL-CAA(2), *trnL-UAA(g/ψ), trnL-UAG, trnM-CAU, trnN-GUU(2), trnP-UGG, trnQ-UUG, trnR-ACG(2), trnR-UCU, trnS-GCU, trnS-GGA, trnS-UGA, trnT-GGU, trnT-UGU, trnV-GAC(2), *trnV-UAC, trnW-CCA, trnY-GUA</i> |
| Other genes                                 | RNA processing                      | <i>matK</i>                                                                                                                                                                                                                                                                                                                                           |
|                                             | Carbon metabolism                   | <i>cemA</i>                                                                                                                                                                                                                                                                                                                                           |
|                                             | Fatty acid synthesis                | <i>accD</i>                                                                                                                                                                                                                                                                                                                                           |
|                                             | Similarity sequence of <i>Orf</i>   | <i>ψorf56(2), orf57(2)</i>                                                                                                                                                                                                                                                                                                                            |
| Genes of unknown function                   | Conserved reading frame             | <i>ψycf15(2), ycf1a, ycf1b, ycf2(g/ψ)(2), *ycf68(2)</i>                                                                                                                                                                                                                                                                                               |

Supplementary Table S3. List of genes in nine cp genome of *Allium* species. (2), two copies; \*, one intron; \*\*, two intron; (g/ψ), gene or pseudogene varied by its genome; (del), absence in *A. tuberosum* Rottl. ex Spreng.

| Species                                  | Coding sequences |                | rRNA      |                | tRNA      |                | Pseudogene |                |
|------------------------------------------|------------------|----------------|-----------|----------------|-----------|----------------|------------|----------------|
|                                          | Size (bp)        | proportion (%) | Size (bp) | proportion (%) | Size (bp) | proportion (%) | Size (bp)  | proportion (%) |
| <i>A. fistulosum</i>                     | 80,406           | 52.50          | 9,050     | 5.91           | 2,859     | 1.87           | 1,765      | 1.15           |
| <i>A. tuberosum</i><br>Rottl. ex Spreng. | 80,391           | 52.18          | 9,050     | 5.87           | 2,859     | 1.86           | 1,550      | 1.01           |
| <i>A. sativum</i>                        | 80,247           | 52.38          | 9,050     | 5.91           | 2,859     | 1.87           | 2,852      | 1.86           |
| <i>A. cepa</i> N                         | 80,271           | 52.26          | 9,050     | 5.89           | 2,859     | 1.86           | 1,763      | 1.15           |
| <i>A. cepa</i> CMS-T                     | 80,421           | 52.41          | 9,050     | 5.90           | 2,859     | 1.86           | 1,759      | 1.15           |
| <i>A. cepa</i> CMS-S                     | 80,283           | 52.28          | 9,050     | 5.89           | 2,859     | 1.86           | 1,763      | 1.15           |
| <i>A. obliquum</i>                       | 80,181           | 52.62          | 9,050     | 5.94           | 2,859     | 1.88           | 2,471      | 1.62           |
| <i>A. prattii</i>                        | 64,419           | 41.70          | 9,035     | 5.85           | 2,774     | 1.80           | 17,782     | 11.51          |
| <i>A. victorialis</i>                    | 81,072           | 52.62          | 9,050     | 5.87           | 2,859     | 1.86           | 1,043      | 0.68           |

Supplementary Table S4. Main components and their proportions in nine *Allium* cp genomes.

| Gene content    | <i>A. fistulosum</i> | <i>A. tuberosum</i><br>Rottl. ex Spreng. | <i>A. sativum</i> | <i>A. cepa</i><br>N | <i>A. cepa</i><br>CMS-T | <i>A. cepa</i><br>CMS-S | <i>A. obliquum</i> | <i>A. prattii</i> | <i>A. victorialis</i> |
|-----------------|----------------------|------------------------------------------|-------------------|---------------------|-------------------------|-------------------------|--------------------|-------------------|-----------------------|
| <i>atpB</i>     | /                    | /                                        | /                 | /                   | /                       | /                       | /                  | ψ                 | /                     |
| <i>ψinfA</i>    | /                    | del                                      | /                 | /                   | /                       | /                       | /                  | /                 | /                     |
| <i>rps16</i>    | /                    | /                                        | ψ                 | /                   | /                       | /                       | ψ                  | /                 | /                     |
| <i>rps2</i>     | ψ                    | ψ                                        | ψ                 | ψ                   | ψ                       | ψ                       | ψ                  | /                 | /                     |
| <i>rbcL</i>     | /                    | /                                        | /                 | /                   | /                       | /                       | /                  | ψ                 | /                     |
| <i>trnL-UAA</i> | /                    | /                                        | /                 | /                   | /                       | /                       | /                  | ψ                 | /                     |
| <i>ycf2(2)</i>  | /                    | /                                        | /                 | /                   | /                       | /                       | /                  | ψ                 | /                     |

Supplementary Table S5. List of the difference in genes content from nine *Allium* cp genome. ψ, pseudogene; /, non-pseudogene; del, absence in *A. tuberosum* Rottl. ex Spreng.; (2), two copies.

| Species                                  | Genome | LSC  | IR   | SSC  | Coding sequence | tRNA  | rRNA  | Pseudogene |
|------------------------------------------|--------|------|------|------|-----------------|-------|-------|------------|
| <i>A. fistulosum</i>                     | 36.8   | 34.6 | 42.7 | 29.7 | 37.46           | 53.06 | 55.25 | 39.26      |
| <i>A. tuberosum</i><br>Rottl. ex Spreng. | 36.9   | 34.7 | 42.7 | 29.7 | 37.59           | 53.17 | 55.29 | 40.00      |
| <i>A. sativum</i>                        | 36.7   | 34.5 | 42.6 | 29.1 | 37.38           | 53.10 | 55.25 | 35.90      |
| <i>A. cepa</i> N                         | 36.8   | 34.6 | 42.7 | 29.7 | 37.48           | 52.99 | 55.25 | 39.02      |
| <i>A. cepa</i> CMS-T                     | 36.8   | 34.6 | 42.7 | 29.7 | 37.46           | 53.06 | 55.25 | 39.28      |
| <i>A. cepa</i> CMS-S                     | 36.8   | 34.6 | 42.7 | 29.7 | 37.48           | 52.99 | 55.25 | 39.02      |
| <i>A. obliquum</i>                       | 36.8   | 34.7 | 42.6 | 29.4 | 37.42           | 52.99 | 55.23 | 37.11      |
| <i>A. prattii</i>                        | 37.0   | 35.0 | 42.7 | 29.9 | 37.36           | 53.35 | 55.30 | 38.92      |
| <i>A. victorialis</i>                    | 37.0   | 34.9 | 42.7 | 30.0 | 37.70           | 53.24 | 55.29 | 41.04      |

Supplementary Table S6. GC content (%) of sequence in nine cp genomes of *Allium* species.



|                  | <i>A. fistulosum</i> |        | <i>A. tuberosum</i><br>Rottl. ex Spreng. |        | <i>A. sativum</i> |        | <i>A. cepa</i><br>N |        | <i>A. cepa</i><br>CMS-T |        | <i>A. cepa</i><br>CMS-S |        | <i>A. obliquum</i> |        | <i>A. prattii</i> |        | <i>A. victorialis</i> |        |
|------------------|----------------------|--------|------------------------------------------|--------|-------------------|--------|---------------------|--------|-------------------------|--------|-------------------------|--------|--------------------|--------|-------------------|--------|-----------------------|--------|
|                  | GC                   | length | GC                                       | length | GC                | length | GC                  | length | GC                      | length | GC                      | length | GC                 | length | GC                | length | GC                    | length |
| <i>ψatpB</i>     | /                    | /      | /                                        | /      | /                 | /      | /                   | /      | /                       | /      | /                       | /      | /                  | /      | 42.34             | 1502   | /                     | /      |
| <i>ψinfA</i>     | 35.29                | 238    | del                                      | del    | 36.70             | 218    | 34.05               | 232    | 34.05                   | 232    | 34.48                   | 232    | 34.05              | 232    | 37.56             | 221    | 37.1                  | 221    |
| <i>ψorf56(2)</i> | 49.43                | 176    | 48.86                                    | 176    | 49.43             | 176    | 49.43               | 176    | 49.43                   | 176    | 49.43                   | 176    | 48.86              | 176    | 49.43             | 176    | 49.43                 | 176    |
| <i>ψrps16</i>    | /                    | /      | /                                        | /      | 30.04             | 1,102  | /                   | /      | /                       | /      | /                       | /      | 31.89              | 715    | /                 | /      | /                     | /      |
| <i>ψrps2</i>     | 37.31                | 705    | 37.64                                    | 728    | 37.61             | 710    | 37.09               | 709    | 37.09                   | 709    | 37.59                   | 705    | 38.18              | 702    | /                 | /      | /                     | /      |
| <i>ψrbcL</i>     | /                    | /      | /                                        | /      | /                 | /      | /                   | /      | /                       | /      | /                       | /      | /                  | /      | 42.97             | 1,473  | /                     | /      |
| <i>ψtrnL-UAA</i> | /                    | /      | /                                        | /      | /                 | /      | /                   | /      | /                       | /      | /                       | /      | /                  | /      | 46.00             | 50     | /                     | /      |
| <i>ψycf15(2)</i> | 36.60                | 235    | 37.02                                    | 235    | 36.60             | 235    | 36.60               | 235    | 36.60                   | 235    | 36.60                   | 235    | 36.17              | 235    | 36.60             | 235    | 36.60                 | 235    |
| <i>ψycf2(2)</i>  | /                    | /      | /                                        | /      | /                 | /      | /                   | /      | /                       | /      | /                       | /      | /                  | /      | 37.92             | 6,857  | /                     | /      |
| Total            | 39.26                | 1,765  | 40.00                                    | 1,550  | 35.90             | 2,852  | 39.02               | 1,763  | 39.02                   | 1,763  | 39.28                   | 1,759  | 37.11              | 2,471  | 38.92             | 17,782 | 41.04                 | 1,043  |

Supplementary Table S7. The content, length (bp) and GC (%) of pseudogene in *Allium* species. (2), two copies; /, non-pseudogene; del, sequence deletion in cp genome.

| Species                               | Tandem repeat | Dispersed repeat | Palindromic repeat | Total number |
|---------------------------------------|---------------|------------------|--------------------|--------------|
| <i>A. cepa</i> N                      | 19            | 17               | 11                 | 47           |
| <i>A. cepa</i> CMS-S                  | 12            | 13               | 12                 | 37           |
| <i>A. cepa</i> CMS-T                  | 19            | 17               | 11                 | 47           |
| <i>A. fistulosum</i>                  | 15            | 14               | 9                  | 38           |
| <i>A. obliquum</i>                    | 21            | 20               | 14                 | 55           |
| <i>A. prattii</i>                     | 11            | 25               | 13                 | 49           |
| <i>A. sativum</i>                     | 14            | 18               | 13                 | 45           |
| <i>A. tuberosum</i> Rottl. ex Spreng. | 11            | 17               | 11                 | 39           |
| <i>A. victorialis</i>                 | 9             | 13               | 15                 | 37           |
| Total number                          | 131           | 154              | 109                | 394          |

Supplementary Table S8. The numbers of tandem repeats, dispersed, and palindromic in nine *Allium* cp genomes.

| Species                               | Mononucleotide |       | Dinucleotide |       | Trinucleotide |      | Tetranucleotide |       | Pentanucleotide |      | Hexanucleotide |      | Total |
|---------------------------------------|----------------|-------|--------------|-------|---------------|------|-----------------|-------|-----------------|------|----------------|------|-------|
|                                       | No.            | %     | No.          | %     | No.           | %    | No.             | %     | No.             | %    | No.            | %    | No.   |
| <i>A. fistulosum</i>                  | 62             | 68.13 | 13           | 14.29 | 3             | 3.30 | 10              | 10.99 | 3               | 3.30 | 0              | 0.00 | 91    |
| <i>A. tuberosum</i> Rottl. ex Spreng. | 45             | 61.64 | 13           | 17.81 | 2             | 2.74 | 11              | 15.07 | 1               | 1.37 | 1              | 1.37 | 73    |
| <i>A. sativum</i>                     | 53             | 61.63 | 18           | 20.93 | 1             | 1.16 | 12              | 13.95 | 2               | 2.33 | 0              | 0.00 | 86    |
| <i>A. cepa</i> N                      | 65             | 67.71 | 15           | 15.63 | 3             | 3.13 | 10              | 10.42 | 3               | 3.13 | 0              | 0.00 | 96    |
| <i>A. cepa</i> CMS-T                  | 65             | 67.71 | 15           | 15.63 | 3             | 3.13 | 10              | 10.42 | 3               | 3.13 | 0              | 0.00 | 96    |
| <i>A. cepa</i> CMS-S                  | 63             | 66.32 | 14           | 14.74 | 3             | 3.16 | 11              | 11.58 | 3               | 3.16 | 1              | 1.05 | 95    |
| <i>A. obliquum</i>                    | 60             | 68.97 | 16           | 18.39 | 2             | 2.30 | 8               | 9.20  | 1               | 1.15 | 0              | 0.00 | 87    |
| <i>A. prattii</i>                     | 65             | 68.42 | 16           | 16.84 | 3             | 3.16 | 11              | 11.58 | 0               | 0.00 | 0              | 0.00 | 95    |
| <i>A. victorialis</i>                 | 65             | 68.42 | 16           | 16.84 | 2             | 2.11 | 12              | 12.63 | 0               | 0.00 | 0              | 0.00 | 95    |
| Total                                 | 543            | 66.71 | 136          | 16.71 | 22            | 2.70 | 95              | 11.67 | 16              | 1.97 | 2              | 0.25 | 814   |

Supplementary Table S9. Types and numbers of SSRs motifs in nine *Allium* cp genomes.

|                                          | Reference<br>length | Reference<br>gene<br>length | Reference<br>Non-gene<br>length | Total conserved<br>sequence | Conserved<br>gene sequence | Conserved<br>Non-gene<br>Sequence |
|------------------------------------------|---------------------|-----------------------------|---------------------------------|-----------------------------|----------------------------|-----------------------------------|
| <i>A. fistulosum</i>                     | 154,074             | 94,024                      | 60,050                          | 97.46%(150,153)             | 99.43%(93,492)             | 94.36%(56,661)                    |
| <i>A. tuberosum</i><br>Rottl. ex Spreng. | 154,074             | 94,024                      | 60,050                          | 98.22%(151,339)             | 99.25%(93,317)             | 96.62%(58,022)                    |
| <i>A. sativum</i>                        | 154,074             | 94,024                      | 60,050                          | 97.34%(149,976)             | 99.40%(93,457)             | 94.12%(56,519)                    |
| <i>A. cepa</i> N                         | 154,074             | 94,024                      | 60,050                          | 97.79%(150,672)             | 99.46%(93,513)             | 95.19%(57,159)                    |
| <i>A. cepa</i> CMS-T                     | 154,074             | 94,024                      | 60,050                          | 97.79%(150,672)             | 99.46%(93,513)             | 95.19%(57,159)                    |
| <i>A. cepa</i> CMS-S                     | 154,074             | 94,024                      | 60,050                          | 97.90%(150,841)             | 99.46%(93,513)             | 95.47%(57,328)                    |
| <i>A. obliquum</i>                       | 154,074             | 94,024                      | 60,050                          | 97.14%(149,667)             | 99.23%(93,304)             | 93.88%(56,373)                    |
| <i>A. prattii</i>                        | 154,074             | 94,024                      | 60,050                          | 97.62%(150,401)             | 99.25%(93,319)             | 95.06%(57,082)                    |

Supplementary Table S10. The conservation statistic of nine *Allium* cp genome sequences using mVISTA. *A. victorialis* as a reference. The "gene" in column 3 and 6 contain all gene components including the coding gene, tRNA, rRNA and pseudogene. The "Non-gene" in column 4 and 7 are the other.

|                                       | <i>A. fistulosum</i> | <i>A. tuberosum</i> Rottl.<br>ex Spreng. | <i>A. sativum</i> | <i>A. cepa</i> N | <i>A. cepa</i><br>CMS-T | <i>A. cepa</i><br>CMS-S | <i>A. obliquum</i> | <i>A. prattii</i> | <i>A. victorialis</i> |
|---------------------------------------|----------------------|------------------------------------------|-------------------|------------------|-------------------------|-------------------------|--------------------|-------------------|-----------------------|
| <i>A. fistulosum</i>                  |                      | 1,872                                    | 1,832             | 469              | 464                     | 436                     | 1,178              | 2,578             | 2,496                 |
| <i>A. tuberosum</i> Rottl. ex Spreng. | 0.01265              |                                          | 2,696             | 1,927            | 1,922                   | 1,881                   | 2,147              | 2,060             | 1,946                 |
| <i>A. sativum</i>                     | 0.01238              | 0.01822                                  |                   | 1,879            | 1,885                   | 1,851                   | 2,123              | <b>3,411</b>      | 3,312                 |
| <i>A. cepa</i> N                      | 0.00317              | 0.01303                                  | 0.01270           |                  | <b>9</b>                | 316                     | 1,222              | 2,634             | 2,536                 |
| <i>A. cepa</i> CMS-T                  | 0.00314              | 0.01299                                  | 0.01274           | <b>0.00006</b>   |                         | 323                     | 1,229              | 2,627             | 2,531                 |
| <i>A. cepa</i> CMS-S                  | 0.00295              | 0.01271                                  | 0.01251           | 0.00214          | 0.00218                 |                         | 1,180              | 2,583             | 2,490                 |
| <i>A. obliquum</i>                    | 0.00796              | 0.01451                                  | 0.01435           | 0.00826          | 0.00831                 | 0.00798                 |                    | 2,838             | 2,757                 |
| <i>A. prattii</i>                     | 0.01743              | 0.01392                                  | <b>0.02306</b>    | 0.01780          | 0.01776                 | 0.01746                 | 0.01918            |                   | 616                   |
| <i>A. victorialis</i>                 | 0.01687              | 0.01315                                  | 0.02239           | 0.01714          | 0.01711                 | 0.01683                 | 0.01864            | 0.00416           |                       |

Supplementary Table S11. Numbers of nucleotide substitutions and sequence distance in nine complete cp genomes. The upper triangle indicates the number of nucleotide substitutions and the lower triangle indicates the number of sequence distances.

| Dataset                     | Number of sites | Best fit model (AIC) | Model in ML | Model in BI |
|-----------------------------|-----------------|----------------------|-------------|-------------|
| Complete chloroplast genome | 137,185         | TPM1uf+G             | GTR+G       | TPM1uf+G    |
| IRB                         | 24,474          | TIM1+I               | GTR+G       | TPM1uf+I    |
| LSC                         | 71,685          | GTR+I+G              | GTR+G       | TIM1+I+G    |
| SSC                         | 16,157          | TVM+G                | GTR+G       | TPM1uf+G    |
| SC                          | 87,855          | GTR+I+G              | GTR+G       | TPM+I+G     |
| Divergence hot regions      | 3,724           | TIM1+I+G             | GTR+G       | TPM1uf+I+G  |

Supplementary Table S12. Sites and models in ML and BI analyses for each dataset.

## Supplementary Figures

Supplementary Figure S1. (A) The order of five nodes by alignment with NC\_024813 using Mummer 3.23. (B) Location outline of five nodes, two gaps and four PCR primers. Four thin lines from the center represent the boundary of chloroplast quadripartite structures. (C) Agarose gel electrophoresis of the two gaps by PCR amplifications.

Supplementary Figure S2. Number, percentage, and distribution of three types of repeat sites in the cp genomic quadripartite structure (A) and in gene structure (B).

Supplementary Figure S3. Detailed number and distribution of three types of repeats in the IGS, CDS and intron regions of the nine *Allium* cp genomes.

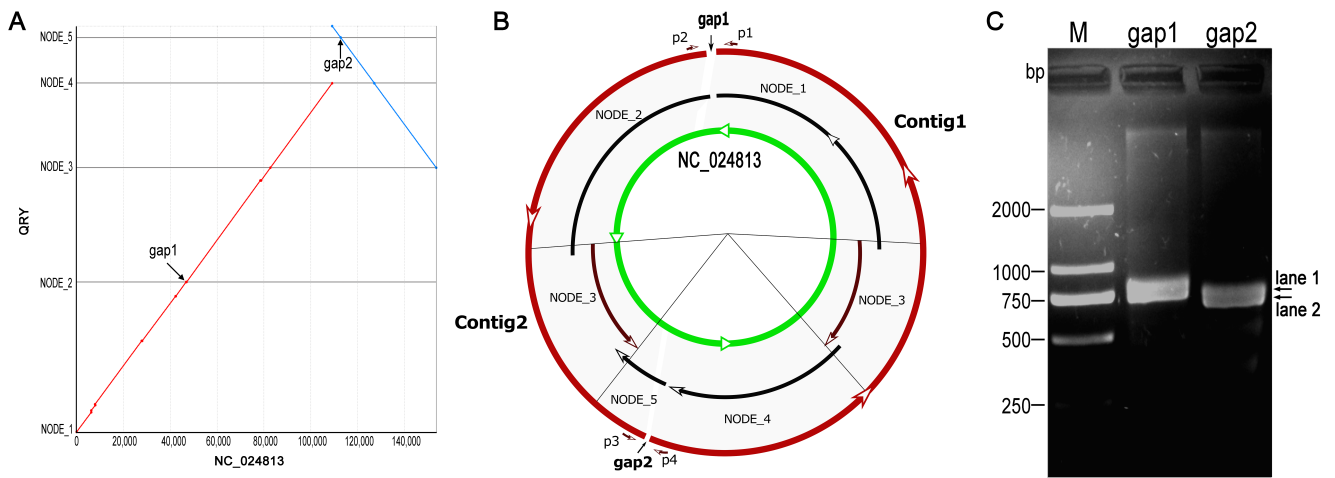

Supplementary Figure S1. (A) The order of five nodes by alignment with NC\_024813 using Mummer 3.23. (B) Location outline of five nodes, two gaps and four PCR primers. Four thin lines from the center represent the boundary of chloroplast quadripartite structures. (C) Agarose gel electrophoresis of the two gaps by PCR amplifications.



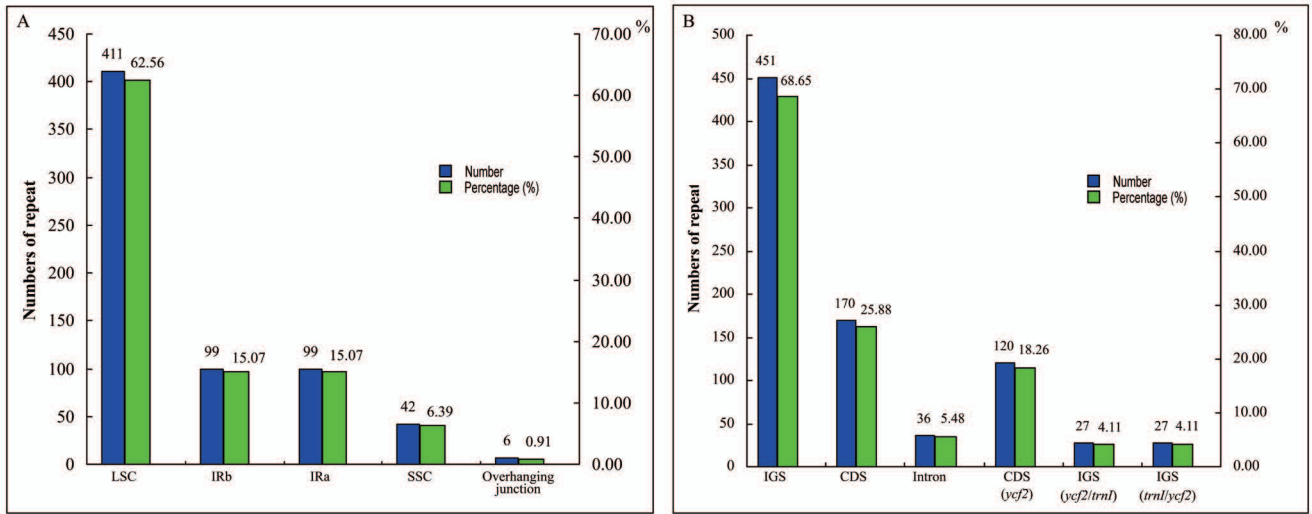

Supplementary Figure S2. Number, percentage, and distribution of three types of repeat sites in the cp genomic quadripartite structure (A) and in gene structure (B).

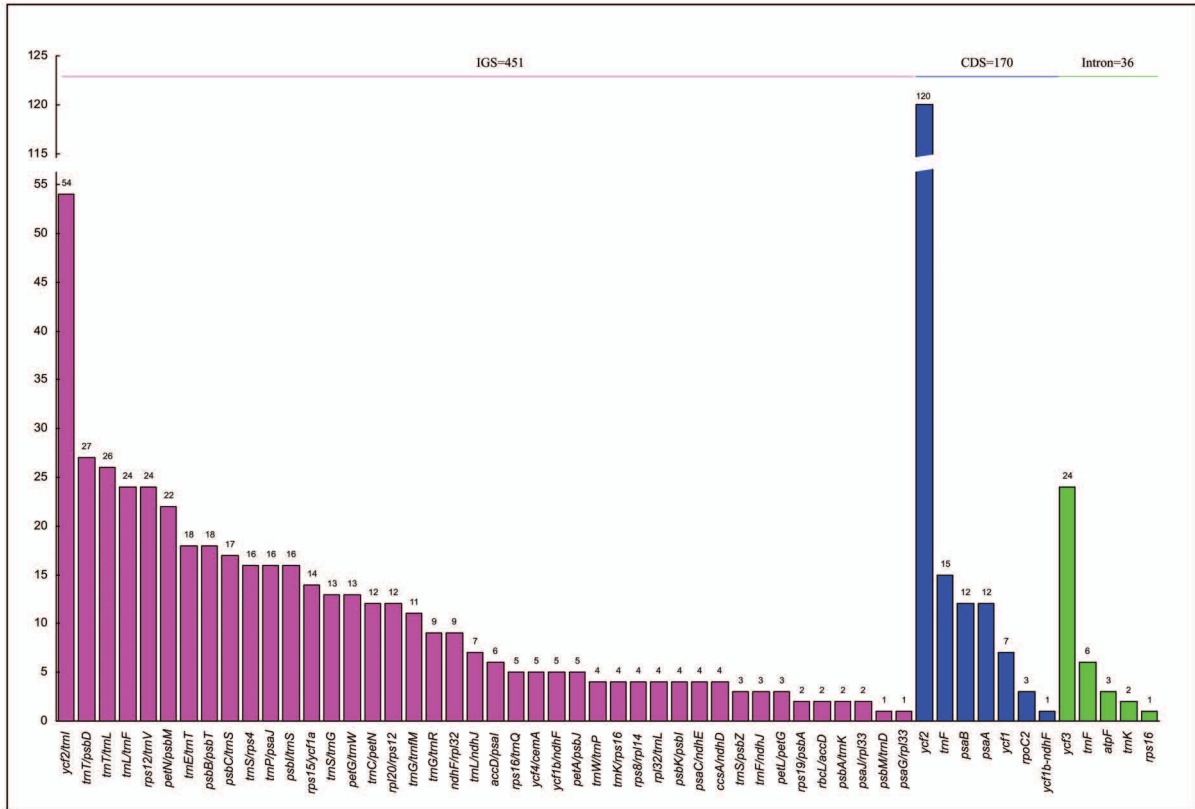

Supplementary Figure S3. Detailed number and distribution of three types of repeats in the IGS, CDS and intron regions of the nine *Allium* cp genomes.

## **Supplementary datasets**

Supplementary Dataset 1 is provided in extra xls file of Supplementary Dataset 1.xls.

Supplementary Dataset 2 is provided in extra xls file of Supplementary Dataset 2.xls.
